1 **EslB is required for cell wall biosynthesis and modification in *Listeria monocytogenes***

2

3 **Jeanine Rismondo<sup>a,b,#</sup>, Lisa M. Schulz<sup>b</sup>, Maria Yacoub<sup>a</sup>, Ashima Wadhawan<sup>c</sup>, Michael**  
4 **Hoppert<sup>b</sup>, Marc S. Dionne<sup>c</sup>, Angelika Gründling<sup>a,#</sup>**

5 <sup>a</sup> Section of Molecular Microbiology and Medical Research Council Centre for Molecular  
6 Bacteriology and Infection, Imperial College London, London SW7 2AZ.

7 <sup>b</sup> Department of General Microbiology, GZMB, Georg-August-University Göttingen, 37077  
8 Göttingen, Germany

9 <sup>c</sup> Department of Life Sciences, Medical Research Council Centre for Molecular Bacteriology  
10 and Infection, Imperial College London, London SW7 2AZ.

11

12

13 <sup>#</sup>To whom correspondence should be addressed:

14 Jeanine Rismondo – [jrismon@gwdg.de](mailto:jrismon@gwdg.de), Angelika Gründling – [a.grundling@imperial.ac.uk](mailto:a.grundling@imperial.ac.uk)

15

16

17 Running title: Characterization of an *eslB* deletion strain

18

19

## 20 **ABSTRACT**

21 Lysozyme is an important component of the innate immune system. It functions by hydrolysing  
22 the peptidoglycan (PG) layer of bacteria. The human pathogen *Listeria monocytogenes* is  
23 intrinsically lysozyme resistant. The peptidoglycan *N*-deacetylase PgdA and *O*-  
24 acetyltransferase OatA are two known factors contributing to its lysozyme resistance.  
25 Furthermore, it was shown that the absence of components of an ABC transporter, here referred  
26 to as EslABC, leads to reduced lysozyme resistance. How its activity is linked to lysozyme  
27 resistance is still unknown. To investigate this further, a strain with a deletion in *eslB*, coding  
28 for a membrane component of the ABC transporter, was constructed in *L. monocytogenes* strain  
29 10403S. The *eslB* mutant showed a 40-fold reduction in the minimal inhibitory concentration  
30 to lysozyme. Analysis of the PG structure revealed that the *eslB* mutant produced PG with  
31 reduced levels of *O*-acetylation. Using growth and autolysis assays, we show that the absence  
32 of EslB manifests in a growth defect in media containing high concentrations of sugars and  
33 increased endogenous cell lysis. A thinner PG layer produced by the *eslB* mutant under these  
34 growth conditions might explain these phenotypes. Furthermore, the *eslB* mutant had a  
35 noticeable cell division defect and formed elongated cells. Microscopy analysis revealed that  
36 an early cell division protein still localized in the *eslB* mutant indicating that a downstream  
37 process is perturbed. Based on our results, we hypothesize that EslB affects the biosynthesis  
38 and modification of the cell wall in *L. monocytogenes* and is thus important for the maintenance  
39 of cell wall integrity.

40

## 41 **IMPORTANCE**

42 The ABC transporter EslABC is associated with the intrinsic lysozyme resistance of *Listeria*  
43 *monocytogenes*. However, the exact role of the transporter in this process and in the physiology  
44 of *L. monocytogenes* is unknown. Using different assays to characterize an *eslB* deletion strain,  
45 we found that the absence of EslB not only affects lysozyme resistance, but also endogenous  
46 cell lysis, cell wall biosynthesis, cell division and the ability of the bacterium to grow in media  
47 containing high concentrations of sugars. Our results indicate that EslB is by a yet unknown  
48 mechanism an important determinant for cell wall integrity in *L. monocytogenes*.

## 49 INTRODUCTION

50 Gram-positive bacteria are surrounded by a complex cell wall, which is composed of a thick  
51 layer of peptidoglycan (PG) and cell wall polymers. The bacterial cell wall is important for the  
52 maintenance of cell shape, the ability of bacteria to withstand harsh environmental conditions  
53 and to prevent cell lysis (1, 2). Due to its importance, cell wall-targeting antibiotics such as  $\beta$ -  
54 lactam, glycopeptide and fosfomycin antibiotics are commonly used to treat bacterial infections  
55 (3, 4). These cell-wall targeting antibiotics inhibit enzymes involved in different stages of the  
56 PG biosynthesis process or sequester substrates of these enzymes (4). Moenomycin, another  
57 cell wall-targeting antibiotic, and  $\beta$ -lactam antibiotics, for instance, block the  
58 glycosyltransferase and transpeptidase activity of penicillin binding proteins, respectively,  
59 which are required for the polymerization and crosslinking of the glycan strands (5-7).  
60 Peptidoglycan is also the target of the cell wall hydrolase lysozyme, which is a component of  
61 animal and human secretions such as tears and mucus. Lysozyme cleaves the glycan strands of  
62 PG by hydrolysing the 1,4- $\beta$ -linkage between *N*-acetylmuramic acid (MurNAc) and *N*-  
63 acetylglucosamine (GlcNAc). This reaction leads to a loss of cell integrity and results in cell  
64 lysis (8). The intracellular human pathogen *Listeria monocytogenes* is intrinsically resistant to  
65 lysozyme due to modifications of its PG. The *N*-deacetylase PgdA deacetylates GlcNAc  
66 residues, whereas MurNAc residues are acetylated by the *O*-acetyltransferase OatA (9, 10).  
67 Consequently, deletion of either of these enzymes results in reduced lysozyme resistance (9,  
68 10). One or both of these enzymes are also present in other bacterial pathogens and important  
69 for lysozyme resistance, such as PgdA in *Streptococcus pneumoniae*, OatA in *Staphylococcus*  
70 *aureus* and PgdA and OatA in *Enterococcus faecalis* (11-14). Besides enzymes that directly  
71 alter the peptidoglycan structure, a number of other factors have been shown to contribute to  
72 lysozyme resistance in diverse bacteria. For instance, the cell wall polymer wall teichoic acid  
73 and the two-component system GraRS contribute to lysozyme resistance in *S. aureus* (15, 16).  
74 In *E. faecalis*, the extracytoplasmic function sigma factor SigV is required for the upregulation  
75 of *pgdA* expression in the presence of lysozyme (11, 17). Recently, some additional factors  
76 have been identified, which contribute to the intrinsic lysozyme resistance of *L. monocytogenes*  
77 such as the predicted carboxypeptidase PbpX, the transcription factor DegU and the noncoding  
78 RNA Rli31 (18). DegU and Rli31 are involved in the regulation of *pgdA* and *pbpX* expression  
79 in *L. monocytogenes* (18). Furthermore, components of a predicted ABC transporter encoded  
80 by the *lmo2769-6* operon in *L. monocytogenes* and here referred to as *esLABCR* for elongation,  
81 sugar- and lysosome sensitive phenotype (Fig. 1) have been associated with lysozyme

82 resistance (18-20). An *eslB* transposon insertion mutant was also shown to be more sensitive  
83 to cefuroxime and cationic antimicrobial peptides (18).

84 ABC transporters can either act as importers or exporters. Importers are involved in the  
85 uptake of sugars, peptides or other metabolites, which are recognized by substrate binding  
86 proteins. On the other hand, toxic compounds such as antibiotics can be exported by ABC  
87 exporters (21-23). They are usually composed of homo- or heterodimeric cytoplasmic  
88 nucleotide-binding domain (NBD) proteins, also referred to as ATP-binding cassette proteins,  
89 and homo- or heterodimeric transmembrane domain (TMD) proteins (24). In addition to NBDs  
90 and TMDs, ABC importers have an extracellular substrate binding protein (SBP) or a  
91 membrane-integrated S-component, which are important for the delivery of specific substrate  
92 molecules to the transporter or substrate binding, respectively (25-27). The *esl* operon encodes  
93 EslA, the NBD protein, EslB, the TMD protein forming part of the ABC transporter, EslC, a  
94 membrane protein of unknown function and EslR, a RpiR-type transcriptional regulator (Fig.  
95 1). So far, it has not been investigated whether EslC is a component of the ABC transporter  
96 encoded in the *esl* operon. EslB and EslC could for instance interact with each other and form  
97 the transmembrane domain of the ABC transporter, or EslC could function independent from  
98 EslAB. Furthermore, it is not known whether the predicted ABC transporter EslABC acts as  
99 an importer or exporter and its exact cellular function has not been identified. Here, we show  
100 that the absence of EslB, one of the transmembrane components of the ABC transporter, leads  
101 to an increased lysozyme sensitivity due to an altered PG structure. In addition, deletion of *eslB*  
102 resulted in the production of a thinner cell wall, and thus to an increased endogenous cell lysis.  
103 Furthermore, cell division is perturbed in the absence of EslB. We hypothesize that EslB may  
104 be required for processes, which are important for the maintenance of the cell wall integrity of  
105 *L. monocytogenes* during stress conditions.

106  
107

## 108 MATERIALS AND METHODS

109 **Bacterial strains and growth conditions.** All strains and plasmids used in this study are listed  
110 in Table S1. *Escherichia coli* strains were grown in Luria-Bertani (LB) medium and *Listeria*  
111 *monocytogenes* strains in brain heart infusion (BHI) medium at 37°C unless otherwise stated.  
112 If necessary, antibiotics and supplements were added to the medium at the following  
113 concentrations: for *E. coli* cultures, ampicillin (Amp) at 100 µg/ml, chloramphenicol (Cam) at  
114 20 µg/ml and kanamycin (Kan) at 30 µg/ml, and for *L. monocytogenes* cultures, Cam at 10  
115 µg/ml, erythromycin (Erm) at 5 µg/ml, Kan at 30 µg/ml, nalidixic acid (Nal) at 20 µg/ml,  
116 streptomycin (Strep) at 200 µg/ml and IPTG at 1 mM.

117

118 **Strain and plasmid construction.** All primers used in this study are listed in Table S2. For  
119 the markerless in-frame deletion of *lmo2768* (*lmg\_01927*, *eslB*), approximately 1kb-DNA  
120 fragments up- and downstream of the *eslB* gene were amplified by PCR using primer pairs  
121 ANG2532/2533 and ANG2534/2535. The resulting PCR products were fused in a second PCR  
122 using primers ANG2532/2535, the product cut with BamHI and XbaI and ligated with plasmid  
123 pKSV7 that had been cut with the same enzymes. The resulting plasmid pKSV7- $\Delta$ *eslB* was  
124 recovered in *E. coli* XL1-Blue yielding strain ANG4236. The plasmid was subsequently  
125 transformed into *L. monocytogenes* strain 10403S and *eslB* deleted by allelic exchange using a  
126 previously described procedure (28). The deletion of *eslB* was verified by PCR. The deletion  
127 procedure was performed with two independent transformants and resulted in the construction  
128 of two independent *eslB* mutant strains 10403S $\Delta$ *eslB*<sub>(1)</sub> (ANG4275) and 10403S $\Delta$ *eslB*<sub>(2)</sub>  
129 (ANG5662). For complementation analysis, pIMK3-*eslB* was constructed, in which the  
130 expression of *eslB* can be induced by IPTG. The *eslB* gene was amplified using primer pair  
131 ANG2812/ANG2813, the product cut with NcoI and Sall and fused with pIMK3 that had been  
132 cut with the same enzymes. The resulting plasmid pIMK3-*eslB* was recovered in *E. coli* XL1-  
133 Blue yielding strain ANG4647. Due to difficulties in preparing electrocompetent cells of *L.*  
134 *monocytogenes eslB* mutant strains, plasmid pIMK3-*eslB* was first electroporated into the  
135 wildtype *L. monocytogenes* strain 10403S yielding strain 10403S pIMK3-*eslB* (ANG4678). In  
136 the second step, *eslB* was deleted from the genome of strain ANG4678 resulting in the  
137 construction of the first *eslB* complementation strain 10403S $\Delta$ *eslB*<sub>(1)</sub> pIMK3-*eslB* (ANG4688,  
138 short 10403S $\Delta$ *eslB*<sub>(1)</sub> compl.). In addition, complementation plasmid pPL3e-P<sub>*eslA*</sub>-*eslABC* was  
139 constructed. To this end, the *eslABC* genes including the upstream promoter region were  
140 amplified by PCR using primers ANG3349/ANG3350. The resulting PCR product was cut

141 with Sall and BamHI and fused with plasmid pPL3e that had been cut with the same enzymes.  
142 Plasmid pPL3e-P<sub>eslA</sub>-*eslABC* was recovered in *E. coli* XL1-Blue yielding strain ANG5660.  
143 Next, plasmid pPL3e-P<sub>eslA</sub>-*eslABC* was transformed into *E. coli* SM10 yielding strain  
144 ANG5661. Lastly, SM10 pPL3e-P<sub>eslA</sub>-*eslABC* was used as a donor strain to transfer plasmid  
145 pPL3e-P<sub>eslA</sub>-*eslABC* by conjugation into *L. monocytogenes* strain 10403SΔ*eslB*(<sub>2</sub>) (ANG5662)  
146 using a previously described method (29). This resulted in the construction of the second *eslB*  
147 complementation strain 10403SΔ*eslB*(<sub>2</sub>) pPL3e-P<sub>eslA</sub>-*eslABC* (ANG5663, short 10403SΔ*eslB*(<sub>2</sub>)  
148 compl.). For the markerless in-frame deletion of *lmo2769* (*lmg\_01926*, *eslA*), and *lmo2767*  
149 (*lmg\_01928*, *eslC*), approximately 1kb-DNA fragments up- and downstream of the  
150 corresponding gene were amplified by PCR using primer pairs LMS160/161 and LMS159/162  
151 (*eslA*), and LMS155/158 and LMS156/157 (*eslC*). The resulting PCR products were fused in  
152 a second PCR using primers LMS159/160 (*eslA*) and LMS155/156 (*eslC*). The products were  
153 cut with BamHI and EcoRI (*eslA*) and BamHI and KpnI (*eslC*) and ligated with plasmid pKSV7  
154 that had been cut with the same enzymes. The resulting plasmids pKSV7-Δ*eslA* and pKSV7-  
155 Δ*eslC* were recovered in *E. coli* XL1-Blue yielding strains EJR54 and EJR43, respectively.  
156 The plasmids were subsequently transformed into *L. monocytogenes* strain 10403S and *eslA*  
157 and *eslC* deleted by allelic exchange yielding strains 10403SΔ*eslA* (LJR33) and 10403SΔ*eslC*  
158 (LJR7). Plasmid pPL3e-P<sub>eslA</sub>-*eslABC* was transferred into LJR33 and LJR7 via conjugation  
159 using strain SM10 pPL3e-P<sub>eslA</sub>-*eslABC* (ANG5661) as a donor strain, yielding strains  
160 10403SΔ*eslA* pPL3e-P<sub>eslA</sub>-*eslABC* (LJR34, short 10403SΔ*eslA* compl.) and 10403SΔ*eslC*  
161 pPL3e-P<sub>eslA</sub>-*eslABC* (LJR21, short 10403SΔ*eslC* compl.).

162 For the construction of bacterial two hybrid plasmids, *eslA*, *eslB* and *eslC* were  
163 amplified by PCR using primer pairs JR44/45, JR46/47 and JR48/49, respectively. The  
164 resulting *eslA* and *eslC* fragments were cut with XbaI and KpnI and ligated into pKT25,  
165 pKNT25, pUT18 and pUT18C that had been cut with the same enzymes. The *eslB* fragment  
166 was cut with XbaI and BamHI and ligated into XbaI/BamHI cut pKT25, pKNT25, pUT18 and  
167 pUT18C. The resulting plasmids were recovered in *E. coli* XL1-Blue yielding strains XL1-  
168 Blue pKNT25-*eslA* (EJR4), XL1-Blue pKT25-*eslA* (EJR5), XL1-Blue pUT18-*eslA* (EJR6),  
169 XL1-Blue pUT18C-*eslA* (EJR7), XL1-Blue pKNT25-*eslB* (EJR8), XL1-Blue pKT25-*eslB*  
170 (EJR9), XL1-Blue pUT18-*eslB* (EJR10), XL1-Blue pUT18C-*eslB* (EJR11), XL1-Blue  
171 pKNT25-*eslC* (EJR12), XL1-Blue pKT25-*eslC* (EJR13) and XL1-Blue pUT18C-*eslC*  
172 (EJR15). Using this approach, we were unable to construct pUT18-*eslC* without acquiring  
173 mutations in *eslC*. In a second attempt to generate pUT18-*eslC*, plasmid pKT25-*eslC* (from



174 strain EJR13) was cut with XbaI and KpnI, the *eslC* fragment extracted and ligated into  
175 XbaI/KpnI cut pUT18. The resulting plasmid was recovered in *E. coli* CLG190 yielding strain  
176 CLG190 pUT18-*eslC* (EJR14).

177 For the localization of an early cell division protein, the N-terminus of ZapA was fused  
178 to mNeonGreen. For this purpose, *mNeonGreen* and *zapA* genes were amplified using primer  
179 pairs JR73/JR39 and JR40/JR74, respectively. The resulting PCR products were fused in a  
180 second PCR using primers JR73/JR74, the product was cut with NcoI and SalI and ligated with  
181 pIMK2 that had been cut with the same enzymes. pIMK2-*mNeonGreen-zapA* was recovered  
182 in *E. coli* XL1-Blue and transformed into *E. coli* S17-1 yielding strains EJR39 and EJR60,  
183 respectively. S17-1 pIMK2-*mNeonGreen-zapA* was used as a donor strain to transfer the  
184 plasmid pIMK2-*mNeonGreen-zapA* by conjugation into *L. monocytogenes* strains 10403S  
185 (ANG1263) and 10403S $\Delta$ *eslB*<sub>(2)</sub> (ANG5662) resulting in the construction of strains 10403S  
186 pIMK2-*mNeonGreen-zapA* (LJR28) and 10403S $\Delta$ *eslB*<sub>(2)</sub> pIMK2-*mNeonGreen-zapA* (LJR29).  
187

188 **Bacterial two-hybrid assays.** Interactions between EslA, EslB and EslC were analyzed using  
189 bacterial adenylate cyclase two-hybrid (BACTH) assays (30). For this purpose, 15 ng of the  
190 indicated pKT25/pKNT25 and pUT18/pUT18C derivatives were co-transformed into *E. coli*  
191 strain BTH101. Transformants were spotted on LB agar plates containing 25  $\mu$ g/ml kanamycin,  
192 100  $\mu$ g/ml ampicillin, 0.5 mM IPTG and 80  $\mu$ g/ml X-Gal and the plates incubated at 30°C.  
193 Images were taken after an incubation of 48 h.

194  
195 **Whole genome sequencing.** Genomic DNA of *L. monocytogenes* was extracted using the  
196 FastDNA™ Kit (MP Biomedicals) and libraries for sequencing were prepared using the  
197 Illumina Nextera DNA kit. The samples were sequenced at the London Institute of Medical  
198 Sciences using an Illumina MiSeq instrument and a 150 paired end Illumina kit. The reads were  
199 trimmed, mapped to the *L. monocytogenes* 10403S reference genome (NC\_017544) and single  
200 nucleotide polymorphisms (SNPs) with a frequency of at least 80% and small deletions (zero  
201 coverage) identified using the CLC workbench genomics (Qiagen).

202  
203 **Growth analysis.** *L. monocytogenes* strains were grown overnight in 5 ml BHI medium at  
204 37°C with shaking. The next day, these cultures were used to inoculate 15 ml fresh BHI  
205 medium or BHI medium containing 0.5 M sucrose, fructose, glucose, maltose, galactose or

206 sodium chloride to an OD<sub>600</sub> of 0.05. The cultures were incubated at 37°C with shaking at 180  
207 rpm, OD<sub>600</sub> readings were taken every hour for 8 h.

208

209 **Determination of minimal inhibitory concentration (MIC).** The minimal inhibitory  
210 concentration for the cell wall-acting antibiotics penicillin and moenomycin and the cell wall  
211 hydrolase lysozyme was determined in 96-well plates using a microbroth dilution assay.  
212 Approximately 10<sup>4</sup> *L. monocytogenes* cells were used to inoculate 200 µl BHI containing two-  
213 fold dilutions of the different antimicrobials. The starting antibiotic concentrations were: 0.025  
214 µg/ml for penicillin G, 0.2 µg/ml for moenomycin and 10 mg/ml or 0.25 mg/ml for lysozyme.  
215 The 96-well plates were incubated at 37°C with shaking at 500 rpm in a plate incubator  
216 (Thermostar, BMG Labtech) and OD<sub>600</sub> determined after 24 hours of incubation. The MIC  
217 value refers to the antibiotic concentration at which bacterial growth was inhibited by >90%.

218

219 **Plate spotting assay.** Overnight cultures of the indicated *L. monocytogenes* strains were  
220 adjusted to an OD<sub>600</sub> of 1 and serially diluted to 10<sup>-6</sup>. 5 µl of each dilution were spotted on BHI  
221 agar plates or BHI agar plates containing 100 µg/ml lysozyme, both containing 1 mM IPTG.  
222 Images of the plates were taken after incubating them for 20-24 h at 37°C.

223

224 **Peptidoglycan isolation and analysis.** Overnight cultures of 10403SΔ*eslB*(1) and  
225 10403SΔ*eslB*(1) compl. were diluted in 1 L BHI broth (supplemented with 1 mM IPTG for  
226 strain 10403SΔ*eslB*(1) compl.) to an OD<sub>600</sub> of 0.06 and incubated at 37°C. At an OD<sub>600</sub> of 1,  
227 bacterial cultures were cooled on ice for 1h and the bacteria subsequently collected by  
228 centrifugation. The peptidoglycan was purified, digested with mutanolysin and the  
229 muropeptides analyzed by HPLC using an Agilent 1260 infinity system, as previously  
230 described (31, 32). Peptidoglycan of the wildtype *L. monocytogenes* strain 10403S was purified  
231 and analyzed in parallel. The chromatogram of the same wild-type control strain was recently  
232 published (33) and also used as part of this study, since all strains were analyzed at the same  
233 time. The major peaks 1-6 were assigned according to previously published HPLC spectra (18,  
234 34), with peaks 2, 4, 5 and 6 corresponding to *N*-deacetylated GlcNAc residues. Peaks 1-2  
235 correspond to monomeric and peaks 4-6 to dimeric (crosslinked) muropeptide fragments. The  
236 Agilent Technology ChemStation software was used to integrate the areas of the main  
237 muropeptide. For quantification, the sum of the peak areas was set to 100% and the area of  
238 individual peaks was determined. The sum of values for peaks 3-6 corresponds to the %



239 crosslinking, whereas the deacetylation state was calculated by adding up the values for peaks  
240 4, 5 and 6. Averages values and standard deviations were calculated from three independent  
241 extractions.

242

243 **O-acetylation assay.** Peptidoglycan of strains 10403S, 10403S $\Delta$ *eslB*(1) and 10403S $\Delta$ *eslB*(1)  
244 compl., which had not been treated with hydrofluoric acid and alkaline phosphatase to avoid  
245 removal of the *O*-acetyl groups, was used for the *O*-acetylation assays. *O*-acetylation was  
246 measured colorimetrically according to the Hestrin method described previously (35) with  
247 slight modifications. Briefly, 800  $\mu$ g of PG (dissolved in 500  $\mu$ l H<sub>2</sub>O) were incubated with an  
248 equal volume of 0.035 M hydroxylamine chloride in 0.75 M NaOH for 10 min at 25°C. Next,  
249 500  $\mu$ l of 0.6 M of perchloric acid and 500  $\mu$ l of 70 mM ferric perchlorate in 0.5 M perchloric  
250 acid were added. The color change resulting from the presence of *O*-acetyl groups was  
251 quantified at 500 nm. An assay reaction with 500  $\mu$ l H<sub>2</sub>O was used as a blank for the absorbance  
252 measurement.

253

254 **Autolysis assays.** *L. monocytogenes* strains were diluted in BHI or BHI medium supplemented  
255 with 0.5 M sucrose to an OD<sub>600</sub> of 0.05 and grown for 4 h at 37°C. Cells were collected by  
256 centrifugation and resuspended in 50 mM Tris-HCl, pH 8 to an OD<sub>600</sub> of 0.7-0.9 and incubated  
257 at 37°C. For penicillin- and lysozyme-induced lysis, 25  $\mu$ g/ml penicillin G or 2.5  $\mu$ g/ml  
258 lysozyme was added to the cultures. Autolysis was followed by determining OD<sub>600</sub> readings  
259 every 15 min.

260

261 **Fluorescence and phase contrast microscopy.** Overnight cultures of the indicated *L.*  
262 *monocytogenes* strains were diluted 1:100 in BHI medium and grown for 3 h at 37°C. For  
263 staining of the bacterial membrane, 100  $\mu$ l of these cultures were mixed with 5  $\mu$ l of 100  $\mu$ g/ml  
264 Nile red solution and incubated for 20 min at 37°C. The cells were washed twice with PBS and  
265 subsequently suspended in 50  $\mu$ l of PBS. 1-1.5  $\mu$ l of the different samples were subsequently  
266 spotted on microscope slides covered with a thin agarose film (1.5 % agarose in distilled water),  
267 air-dried and covered with a cover slip. Phase contrast and fluorescence images were taken at  
268 1000x magnification using the Zeiss Axio Imager.A1 microscope coupled to an AxioCam  
269 MRm and processed using the Zen 2012 software (blue edition). The Nile red fluorescence  
270 signal was detected using the Zeiss filter set 00. The length of 300 cells was measured for each  
271 experiment and the median cell length was calculated.

272 For ZapA-localization studies, overnight cultures of the indicated *L. monocytogenes*  
273 strains were grown in BHI medium at 37°C to an OD<sub>600</sub> of 0.3-0.5. The staining of the bacterial  
274 membrane with Nile red was performed as described above. After Nile red staining, cells were  
275 fixed in 1.2% paraformaldehyde for 20 min at RT. 1-1.5 µl of the different samples were  
276 spotted on microscope slides as described above. Phase contrast and fluorescence images were  
277 taken at 1000x magnification using the Zeiss Axioskop 40 coupled to an AxioCam MRm and  
278 processed using the Axio Vision software (release 4.7). The Nile red and mNeonGreen  
279 fluorescence signals were detected using the Zeiss filter set 43 and 37, respectively.

280

281 **Transmission electron microscopy.** Overnight cultures of *L. monocytogenes* strains 10403S,  
282 10403SΔ*eslB*<sub>(2)</sub> and 10403SΔ*eslB*<sub>(2)</sub> compl. were used to inoculate 25 ml BHI broth or BHI  
283 broth supplemented with 0.5 M sucrose to an OD<sub>600</sub> of 0.05. Bacteria were grown at 37°C and  
284 200 rpm for 3.5 h (BHI broth) or 6 h (BHI broth containing 0.5 M sucrose). 15 ml of the cultures  
285 were centrifuged for 10 min at 4000 rpm, the cell pellet washed twice in phosphate-buffered  
286 saline (127 mM NaCl, 2.7 mM KCl, 10 mM Na<sub>2</sub>HPO<sub>4</sub>, 1.8 mM KH<sub>2</sub>PO<sub>4</sub>, pH 7.4) and fixed  
287 overnight in 2.5 % (w/v) glutaraldehyde at 4°C. Cells were then mixed with 1.5 % (w/v, final  
288 concentration in PBS) molten Bacto-Agar, kept liquid at 55°C. After solidification, the agar  
289 block was cut into pieces with a volume of 1 mm<sup>3</sup>. A dehydration series was performed (15 %  
290 aqueous ethanol solution for 15 min, 30 %, 50 %, 70 % and 95 % for 30 min and 100 % for 2x  
291 30 min) at 0°C, followed by an incubation step in 66 % (v/v, in ethanol) LR-white resin mixture  
292 (Plano) for 2 h at RT and embedded in 100 % LR-white solution overnight at 4°C. One agar  
293 piece was transferred to a gelatin capsule filled with fresh LR-white resin, which was  
294 subsequently polymerized at 55°C for 24 h. A milling tool (TM 60, Reichert & Jung, Vienna,  
295 Austria) was used to shape the gelatin capsule into a truncated pyramid. An ultramicrotome  
296 (Reichert Ultracut E, Leica Microsystems, Wetzlar, Germany) and a diamond knife (Delaware  
297 Diamond Knives, Wilmington, DE, USA) were used to obtain ultrathin sections (80 nm) of the  
298 samples. The resulting sections were mounted on mesh specimen grids (Plano) and stained  
299 with 4 % (w/v) uranyl acetate solution (pH 7.0) for 10 min. Microscopy was performed using  
300 a Jeol JEM 1011 transmission electron microscope (Jeol Germany GmbH, Munich) at 80 kV.  
301 Images were taken at a magnification of 30,000 and recorded with an Orius SC1000 CCD  
302 camera (Pleasanton, CA, USA). For each replicate, 20 cells were photographed and cell wall  
303 thickness was measured at three different locations using the ImageJ software (36). The

304 average of the three measurements was calculated and the average and standard deviation of  
305 20 cells plotted. The experiment was performed twice.

306

307 **Cell culture.** Bone marrow-derived macrophages (BMMs) were extracted from female  
308 C57BL/6 mice as described previously (37). BMMs were a gift from Charlotte S. C. Michaux  
309 and Sophie Helaine.  $5 \times 10^5$  BMMs were seeded per well of a 24-well plate and grown overnight  
310 in 500  $\mu$ l high glucose Dulbecco's Modified Eagle Medium (DMEM) at 37°C and 5% CO<sub>2</sub>. *L.*  
311 *monocytogenes* strains were grown overnight without shaking in 2 ml BHI medium at 30°C.  
312 The next morning, bacteria were opsonized with 8% mouse serum (Sigma-Aldrich) at room  
313 temperature for 20 min and BMMs were infected for one hour at a multiplicity of infection  
314 (MOI) of 2. BMMs were washed with PBS and 1 ml DMEM containing 40  $\mu$ g/ml gentamycin  
315 was added to kill extracellular bacteria. After 1 h, cells were washed with PBS and covered  
316 with 1 ml DMEM containing 10  $\mu$ g/ml gentamycin. The number of recovered bacteria was  
317 determined 2, 4, 6 and 8 h post infection. To this end, BMMs were lysed using 1 ml PBS  
318 containing 0.1% (v/v) triton X-100 and serial dilutions were plated on BHI agar plates. The  
319 number of colony forming units (CFUs) was determined after incubating the plates overnight  
320 at 37°C. Three technical repeats were performed for each experiment and average values  
321 calculated. Average values and standard deviations from three independent experiments were  
322 plotted.

323

324 ***Drosophila melanogaster* infections.** Fly injections were carried out with microinjection  
325 needles produced from borosilicate glass capillaries (World Precision Instruments TW100-4)  
326 and a needle puller (Model PC-10, Narishige). Injections were performed using a Picospritzer  
327 III system (Parker Hannifin), and the injection volume was calibrated by expelling a drop of  
328 liquid from the needle into a pot of mineral oil and halocarbon oil (both Sigma). The expelled  
329 drop was measured using the microscope graticule to obtain a final injection volume of 50  
330 nanolitres (nl). Flies were then anesthetized with CO<sub>2</sub> and injected with either 50 nl of bacterial  
331 suspension in PBS or sterile PBS. 5-7-day old age matched male flies were used for all  
332 experiments. Flies were grouped into uninjected control, wounding control (injection with  
333 sterile PBS), and flies infected with *L. monocytogenes*. Each group consisted of 58-60 flies.  
334 All survival experiments were conducted at 29°C. Dead flies were counted daily. Food vials  
335 were placed horizontally to reduce the possibility of fly death from flies getting stuck to the  
336 food, and flies were transferred to fresh food every 3-4 days. For the quantification of the  
337 bacterial load, 16 flies per condition and per bacterial strain were collected at the indicated time

338 points. The flies were homogenised in 100 µl of TE-buffer pH 8 containing 1% Triton X-100  
339 and 1% Proteinase K (NEB, P8107S). Homogenates were incubated for 3 h at 55°C followed  
340 by a 10 min incubation step at 95°C. Following incubation, qPCR was carried out using the  
341 *actA* gene specific primers EGD-E\_ActA\_L1 and EGD-E\_ActA\_R1 to determine the number  
342 of bacterial colony forming units. PCR was performed with Sensimix SYBR Green no-ROX  
343 (Bioline) on a Corbett Rotor-Gene 6000. The cycling conditions were as follows: Hold 95°C  
344 for 10 min, then 45 cycles of 95°C for 15 s, 57°C for 30 s, 72°C for 30 s, followed by a melting  
345 curve. Gene abundances were calculated as previously described (38).

346

## 347 **RESULTS**

### 348 **EslC interacts with the transmembrane protein EslB**

349 Previously it has been shown that *L. monocytogenes* strains with mutations in the *eslABCR*  
350 operon (Fig. 1A) display decreased resistance towards the cell wall hydrolase lysozyme (18,  
351 19). The *esl* operon encodes the ATP binding protein EslA and the transmembrane proteins  
352 EslB and EslC, which are proposed to form an ABC transporter. However, it is currently  
353 unknown if EslC forms part of the ABC transporter as depicted in Figure 1B and if it is required  
354 for the function of the transporter. To gain insights into the composition of the ABC transporter,  
355 we assessed the interaction between EslA, EslB and EslC using the bacterial adenylate cyclase-  
356 based two-hybrid system. In addition to self-interactions of EslA, EslB and EslC, we observed  
357 an interaction between EslB and EslC (Fig. 1C), indicating that EslC might be part of the ABC  
358 transporter.

359

### 360 **Deletion of *eslB* in *L. monocytogenes* leads to lysozyme sensitivity and an altered** 361 **peptidoglycan structure.**

362 An *eslA* in-frame deletion mutant and an *eslB* transposon insertion mutant were shown to be  
363 more sensitive to lysozyme compared to the wildtype strain (18, 19). However, it is still  
364 unknown how the function of an ABC transporter is linked to this phenotype. To investigate  
365 this further, strains with markerless in-frame deletions in *eslA*, *eslB* and *eslC* were constructed  
366 in the *L. monocytogenes* strain background 10403S. First, the lysozyme resistance of these  
367 mutants was assessed using a plate spotting assay. The *eslA* and *eslB* mutants showed reduced  
368 growth on BHI plates containing 100 µg/ml lysozyme compared to the wildtype and *eslA* and  
369 *eslB* complementation strains (Fig. 2A). On the other hand, no phenotype was observed for the  
370 *eslC* mutant (Fig. 2A). Since deletion of *eslA* and *eslB* resulted in a decreased lysozyme

371 resistance, and an *eslA* mutant has already been characterized in previous work (19), we  
372 focused here on the characterization of the *eslB* deletion strain.

373 In the course of the study, we determined the genome sequence of the originally  
374 constructed *eslB* mutant (10403SΔ*eslB*<sub>(1)</sub>) by whole genome sequencing (WGS) and identified  
375 an additional small deletion in gene *lmo2396* coding for an internalin protein with a leucine-  
376 rich repeat (LRR) and a mucin-binding domain (Table S3). While to the best of our knowledge,  
377 the contribution of Lmo2396 to the growth and pathogenicity of *L. monocytogenes* has not yet  
378 been investigated, other internalins are important and well-established virulence factors (39,  
379 40). Our WGS analysis also revealed a single point mutation in gene *lmo2342*, coding for a  
380 pseudouridylate synthase in the complementation strain 10403SΔ*eslB*<sub>(1)</sub> compl. (Table S3).  
381 Since we identified an additional mutation in a gene coding for a potential virulence factor in  
382 the *eslB* mutant, we constructed a second independent *eslB* mutant, 10403SΔ*eslB*<sub>(2)</sub>. We also  
383 constructed a second complementation strain, strain 10403SΔ*eslB*<sub>(2)</sub> *P<sub>eslA</sub>-eslABC* (or short  
384 10403SΔ*eslB*<sub>(2)</sub> compl.), in which the *eslABC* genes are expressed from the native *eslA*  
385 promoter from a chromosomally integrated plasmid. Our WGS analysis revealed that strain  
386 10403SΔ*eslB*<sub>(2)</sub> did not contain any secondary mutations (Table S3). A 1-bp deletion in gene  
387 *lmo2022* encoding a predicted NifS-like protein required for NAD biosynthesis, was identified  
388 in strain 10403SΔ*eslB*<sub>(2)</sub> compl. (Table S3), which if non-complementable phenotypes are  
389 observed needs to be kept in mind. We confirmed that our second *eslB* mutant strain  
390 10403SΔ*eslB*<sub>(2)</sub> showed the same lysozyme sensitivity phenotype and that this phenotype could  
391 be complemented in strain 10403SΔ*eslB*<sub>(2)</sub> compl., in which *eslB* is expressed along with *eslA*  
392 and *eslC* from its native promoter (Fig. 2A). Since we only identified the genomic alterations  
393 in the course of the study, some experiments were performed as stated in the text with the  
394 original *eslB* mutant and complementation strains 10403SΔ*eslB*<sub>(1)</sub> and 10403SΔ*eslB*<sub>(1)</sub> compl.,  
395 while other experiments were conducted with strains 10403SΔ*eslB*<sub>(2)</sub> and 10403SΔ*eslB*<sub>(2)</sub>  
396 compl.

397 Using microbroth dilution assays, we observed a 40-fold lower MIC for lysozyme for  
398 *L. monocytogenes* strain 10403SΔ*eslB*<sub>(1)</sub> as compared to the wildtype strain (Fig. 2B and S1A)  
399 (18, 19). This phenotype could be complemented and strain 10403SΔ*eslB*<sub>(1)</sub> compl., in which  
400 *eslB* is expressed from an IPTG-inducible promoter, is even slightly more resistant to lysozyme  
401 as compared to the wildtype strain (Fig. 2B). Next, we tested whether the resistance towards  
402 two cell wall-targeting antibiotics, namely penicillin and moenomycin, is changed upon  
403 deletion of *eslB*. The MIC values obtained for the wildtype, *eslB* deletion and *eslB*

404 complementation strains were comparable (Fig. 2C-D), suggesting that the deletion of *eslB*  
405 does not lead to a general sensitivity to all cell wall-acting antimicrobials but is specific to  
406 lysozyme. In *L. monocytogenes*, lysozyme resistance is achieved by the modification of the  
407 peptidoglycan (PG) by *N*-deacetylation via PgdA and *O*-acetylation via OatA (9, 10). To assess  
408 whether deletion of *eslB* affects the *N*-deacetylation and crosslinking of PG, PG was isolated  
409 from wildtype 10403S, the *eslB* deletion and complementation strains, digested with  
410 mutanolysin and the muropeptides analyzed by high performance liquid chromatography  
411 (HPLC). This analysis revealed a slight increase in PG crosslinking in the *eslB* mutant strain  
412 ( $68\pm 0.53\%$ ) compared to the wildtype ( $65.47\pm 0.31\%$ ) and the complementation strain grown  
413 in the presence of IPTG ( $64.57\pm 2.3\%$ ) (Fig. 3A-B). The GlcNAc residues of the PG isolated  
414 from the *eslB* deletion strain were also slightly more deacetylated ( $71.54\pm 0.21\%$ ) as compared  
415 to the wildtype ( $67.17\pm 0.31\%$ ) and the complementation strain ( $67\pm 2.27\%$ ) (Fig. 3A-B), which  
416 should theoretically result in an increase and not decrease in lysozyme resistance. However,  
417 when we assessed the degree of *O*-acetylation using a colorimetric assay, the PG isolated from  
418 the *eslB* mutant was less *O*-acetylated compared to the wildtype and the complementation  
419 strain (Fig. 3C). Taken together, our results suggest that slight changes in the PG structure and  
420 in particular the observed reduction in *O*-acetylation likely contribute to the lysozyme  
421 sensitivity of the *eslB* deletion strain.

422

#### 423 **Deletion of *eslB* results in a growth defect in high sugar media.**

424 The bacterial cell wall is an important structure to maintain the cell integrity and to prevent  
425 lysis due to high internal turgor pressure or when bacteria experience changes in the external  
426 osmolality. Alterations of the PG structure or other cell wall defects leading to an impaired cell  
427 wall integrity could affect the growth of bacteria in environments with high osmolalities, e.g.  
428 in the presence of high salt or sugar concentrations. Next, we compared the growth of the  
429 wildtype, the *eslB* mutant and complementation strains at 37°C in different media. No growth  
430 difference could be observed between the strains tested, when grown in BHI medium (Fig. 4A  
431 and S1B). However, the *eslB* deletion strain grew slower in BHI medium containing 0.5 M  
432 sucrose as compared to the wildtype and the *eslB* complementation strain (Fig. 4B and S1C).  
433 A similar growth phenotype could be observed when the strains were grown in BHI medium  
434 containing either 0.5 M fructose, glucose, maltose or galactose (Fig. S2). In contrast, the  
435 presence of 0.5 M NaCl did not affect the growth of the *eslB* deletion strain (Fig. 4C). These  
436 results suggest that the observed growth defect seen for the *eslB* mutant is not solely caused by



437 the increase in external osmolality, but rather seems to be specific to the presence of high  
438 concentrations of sugars.

439

#### 440 **Deletion of *eslB* results in increased endogenous and lysozyme-induced lysis.**

441 The observed lysozyme sensitivity and the growth defect of the *eslB* deletion strain in media  
442 containing high concentrations of sucrose raised the question, whether the absence of *EslB*  
443 might also cause an impaired cell wall integrity and an increased autolysis due to this  
444 impairment. To test this, autolysis assays were performed. To this end, the *L. monocytogenes*  
445 wildtype strain 10403S, the *eslB* deletion and complementation strains were grown in BHI  
446 medium and subsequently transferred in a Tris-HCl buffer (pH 8). After 2 h incubation at 37°C,  
447 the OD<sub>600</sub> of the suspensions of the wildtype and *eslB* complementation strain had dropped to  
448 89.9±1.6% and 86.5±2.9% of the initial OD<sub>600</sub>, respectively (Fig. 5A). Enhanced endogenous  
449 cell lysis was observed for the *eslB* mutant strain and the OD<sub>600</sub> of the suspensions dropped to  
450 68.8±1.7% within 2 h (Fig. 5A). The addition of penicillin had no impact on the cell lysis of  
451 any of the strains tested (Fig. 5B). On the other hand, the addition of 2.5 µg/ml lysozyme  
452 increased the rate of cell lysis of all strains, but had a particularly drastic effect on the *eslB*  
453 mutant. After 30 min, the OD<sub>600</sub> reading of a suspension of the *eslB* deletion strain had dropped  
454 to 50.3±10.2%. For the wildtype and *eslB* complementation strains, it took 90 min to see a 50%  
455 reduction in the OD<sub>600</sub> readings (Fig. 5C).

456 Next, we wanted to determine what impact the growth in the presence of high levels of  
457 sucrose has on endogenous bacterial autolysis rates. To this end, the wildtype 10403S, *eslB*  
458 mutant and complementation strains were grown in BHI medium supplemented with 0.5 M  
459 sucrose, cell suspensions prepared in Tris-buffer and used in autolysis assays. While the  
460 wildtype and complementation strain showed similar autolysis rates following growth in BHI  
461 sucrose medium (Fig. 5D) as after growth in BHI medium (Fig 5A), the *eslB* mutant lysed  
462 rapidly following growth in BHI 0.5 M sucrose medium (Fig. 5E). The lysis of the *eslB* mutant  
463 strain could be further enhanced by the addition of 25 µg/ml penicillin, a concentration which  
464 only acts bacteriostatic on the wildtype *L. monocytogenes* strain 10403S (Fig. 5E). These  
465 findings indicate that the *eslB* mutant is sensitive to osmotic downshifts and we thus wondered  
466 whether in addition to the changes in the PG modifications and crosslinking, more general  
467 differences in the ultrastructure of the cell wall might be observed. To test this, cells of *L.*  
468 *monocytogenes* strains 10403S, 10403SΔ*eslB*(2) and 10403SΔ*eslB*(2) compl. were subjected to  
469 transmission electron microscopy. The *eslB* deletion strain produces a thinner PG layer of

470 15.8±1.9 nm, when grown in BHI broth as compared to the wildtype (20±3.4 nm) and the  
471 complementation strain (20±4.3 nm, Fig. 6A-B). This phenotype was even more pronounced  
472 when the strains were grown in BHI broth containing 0.5 M sucrose. The PG layer of the *eslB*  
473 mutant had a thickness of 15±2 nm, while wildtype and the complementation strain produced  
474 a PG layer of 21.4±3.1 and 23.3±2.8 nm, respectively (Fig. 6A-B). We hypothesize that the  
475 enhanced endogenous lysis of the *eslB* mutant is likely caused by a thinner PG layer combined  
476 with the observed alterations in PG structure such as reduced *O*-acetylation.

477

#### 478 **The *eslB* deletion strain is impaired in cell division, but not in virulence.**

479 The increased endogenous autolysis together with the observed changes in the PG structure of  
480 the *eslB* deletion strain could result in an increased sensitivity to autolysins. The major  
481 autolysins of *L. monocytogenes* are p60 and NamA, which hydrolyze PG and are required for  
482 daughter cell separation during cell division (41, 42). Absence of either p60 or NamA results  
483 in the formation of chains (41, 42). We thus wondered whether deletion of *eslB* causes changes  
484 in the cell morphology of *L. monocytogenes*. Microscopic analysis revealed that cells lacking  
485 EslB are significantly longer with a median cell length of 3.26±0.25 µm as compared to the *L.*  
486 *monocytogenes* wildtype strain, which produced cells with a length of 1.85±0.08 µm (Fig. 6C-  
487 D), highlighting that the absence of EslB results in a cell division defect. To test whether the  
488 assembly of the early divisome is affected by the absence of EslB, we compared the localization  
489 of the early cell division protein ZapA in the wildtype and the *eslB* mutant background. In *L.*  
490 *monocytogenes* wildtype cells, a signal was observed at midcell for cells, which have initiated  
491 the division process (Fig. 6E). While short cells of the *eslB* mutant also only possess a single  
492 fluorescent signal, several ZapA fluorescence foci could be observed in elongated cells (Fig.  
493 6E), suggesting that early cell division proteins can still localize in the *eslB* mutant and that a  
494 process downstream seems to be perturbed in the absence of EslB.

495 Next, we wanted to assess whether the impaired cell integrity and the observed cell  
496 division defect would also affect the virulence of the *L. monocytogenes eslB* mutant. Of note,  
497 in a previous study, it was shown that deletion of *eslA*, coding for the ATP-binding protein  
498 component of the ABC transporter, has no effect on the cell-to-cell spread of *L. monocytogenes*  
499 (19). To determine whether EslB is involved in the virulence of *L. monocytogenes*, primary  
500 mouse macrophages were infected with wildtype 10403S, the *eslB* mutant 10403SΔ*eslB*(2) and  
501 complementation strain 10403SΔ*eslB*(2) compl.. All three strains showed a comparable  
502 intracellular growth pattern (Fig. 7A), suggesting that EslB does not impact the ability of *L.*

503 *monocytogenes* to grow in primary mouse macrophages. Next, we assessed the ability of the  
504 *eslB* deletion strains to kill *Drosophila melanogaster* as lysozyme is one important component  
505 of its innate immune response (43). All uninfected flies (U/C) and 96.6% of the flies that were  
506 injected with PBS survived the duration of the experiment (Fig. 7B). No statistically significant  
507 difference could be observed for the survival and bacterial load of flies infected with the  
508 different *L. monocytogenes* strains (Fig. 7B-C). These results indicate that, while EslB does  
509 not impact the ability of *L. monocytogenes* to infect and kill mammalian macrophages or  
510 *Drosophila melanogaster*, it nonetheless impacts the cell division and cell wall integrity of *L.*  
511 *monocytogenes* and consistent with this we have identified changes in the composition and  
512 thickness of the peptidoglycan layer.

513

## 514 DISCUSSION

515 Over the past years, several determinants contributing to the intrinsic lysozyme resistance of  
516 *L. monocytogenes* have been described (9, 10, 18, 19). One of these is a predicted ABC  
517 transporter encoded as part of the *eslABCR* operon (18, 19). In this study, we aimed to further  
518 investigate the role of the ABC transporter EslABC in lysozyme resistance of *L.*  
519 *monocytogenes*. Using bacterial two hybrid assays, we could show that EslB and EslC interact  
520 with each other and hence it is tempting to speculate that the transmembrane component of the  
521 ABC transporter consists of a heterodimer of EslB and EslC. However, analysis of different  
522 deletion mutants revealed that only EslA and EslB are required for lysozyme resistance of *L.*  
523 *monocytogenes*, suggesting that EslC is not required for the function of the ABC transporter  
524 under our assay conditions. Surprisingly, we did not observe an interaction between EslA and  
525 EslB using bacterial two hybrid assays, thus, further experiments are required to determine the  
526 composition of the ABC transporter and its interaction partners.

527 Next, we analyzed the PG structure of the *eslB* deletion strain and found that the PG  
528 isolated from the *eslB* mutant was slightly more crosslinked and also the fraction of  
529 deacetylated GlcNAc residues was slightly increased as compared to the PG isolated from the  
530 wildtype strain 10403S. Deacetylation of GlcNAc residues in PG is achieved by the *N*-  
531 deacetylase PgdA and has been shown to lead to increased lysozyme resistance (9). Since we  
532 saw a slight increase in the deacetylation of GlcNAc residues in the *eslB* mutant strain, our  
533 results indicate that the lysozyme sensitivity phenotype of the *eslB* deletion strain is  
534 independent of PgdA and that this enzyme functions properly in the mutant strain. A second  
535 enzyme required for lysozyme resistance in *L. monocytogenes* is OatA, which transfers *O*-  
536 acetyl groups to MurNAc (10, 44, 45). Using a colorimetric *O*-acetylation assay, we were able

537 to show that PG isolated from the *eslB* mutant is less *O*-acetylated and we assume that this  
538 reduction in *O*-acetylation contributes to the lysozyme sensitivity of strain 10403S $\Delta$ *eslB*.

539 Growth comparisons in different media revealed that the absence of EslB results in a  
540 reduced growth in BHI broth containing high concentrations of mono- or disaccharides. One  
541 could speculate that the EslABC transporter might be a sugar transporter with a broad sugar  
542 spectrum. However, we could not identify a potential substrate binding protein encoded in the  
543 *esl* operon, which is important for substrate recognition and delivery to ABC importers.  
544 EslABC could also be involved in the export of PG components and thus affecting cell wall  
545 biosynthesis in *L. monocytogenes*. Indeed, we could show that the *eslB* mutant produces a  
546 thinner PG layer as compared to the wildtype strain, suggesting that EslABC affects PG  
547 biosynthesis. Future studies will aim to determine how the ABC transporter EslABC influences  
548 the biosynthesis and subsequent modification of PG in *L. monocytogenes*.

549 Absence of EslB leads to the formation of elongated cells, however, it is currently not  
550 clear how the function of EslABC is linked to cell division of *L. monocytogenes*. It seems  
551 unlikely that the activity or levels of the autolysins p60 and NamA are affected by the absence  
552 of EslB. While *iap* and *namA* mutants also form chains of cells, the cell length of individual  
553 cells is still similar to wild-type cells, however the bacteria are just unable to separate (41, 42,  
554 46). This is in contrast to the *eslB* mutant, in which the cell length of individual cells is  
555 increased suggesting that cell division is blocked at an earlier step. In elongated cells of the  
556 *eslB* mutant, we could observe several ZapA foci, suggesting that really early cell division  
557 proteins can still be recruited in this strain. Thus, a process downstream of ZapA localization  
558 but before the construction of the actual cell septum is perturbed in the absence of EslB.  
559 EslABC could potentially affect the activity of cell division proteins or the localization of late  
560 cell division-specific proteins. Hence, deletion of *eslB* could lead to a delayed assembly of an  
561 active divisome, which could lead to an altered PG biosynthesis at the division site and an  
562 impaired cell integrity. Indeed, cells of the *eslB* mutant lysed more rapidly as compared to the  
563 *L. monocytogenes* wildtype strain 10403S when shifted from BHI broth to Tris-buffer. The  
564 autolysis of cells lacking EslB was strongly induced following growth in BHI supplemented  
565 with 0.5 M sucrose prior to the incubation in Tris-buffer. These results indicate that the *eslB*  
566 mutant is sensitive to an osmotic downshift and we hypothesize that this is due to the  
567 production of a thinner PG layer and a resulting impaired cell integrity.

568 Reduced lysozyme resistance is often associated with reduced virulence. An *E. faecalis*  
569 strain with a deletion in the gene coding for the peptidoglycan deacetylase PgdA, showed a

570 reduced ability to kill *Galleria mellonella* (11). Similarly, a *S. pneumoniae* *pgdA* mutant  
571 showed a decreased virulence in a mouse model of infection (13). In our study, we found that  
572 inactivation of *EslB* does not affect the intracellular growth of *L. monocytogenes* in primary  
573 mouse macrophages or the ability to kill *Drosophila melanogaster*. These observations are  
574 consistent with a previous report that another component of the *EslABC* transporter, *EslA*, is  
575 dispensable for the ability of *L. monocytogenes* to spread from cell to cell (19). Previously, it  
576 was also shown that combined inactivation of *PgdA* and *OatA* reduced the ability of *L.*  
577 *monocytogenes* to grow in bone-marrow derived macrophages, whereas inactivation of *PgdA*  
578 alone had no impact on the virulence of *L. monocytogenes* (44). We therefore reason that the  
579 changes in PG structure and associated reduction in lysozyme resistance caused by deletion of  
580 *eslB* are not sufficient to affect the ability of *L. monocytogenes* to grow and survive in primary  
581 macrophages and flies.

582 Taken together, we could show that *EslB* is not only important for the resistance  
583 towards lysozyme, its absence also affects the autolysis, cell division and the ability of *L.*  
584 *monocytogenes* to grow in media containing high concentrations of sugars. Our results indicate  
585 that the *ABC* transporter *EslABC* has a direct or indirect impact on peptidoglycan biosynthesis  
586 and maintenance of cell integrity in *L. monocytogenes*.

587

## 588 DATA AVAILABILITY

589 The Illumina reads for the *L. monocytogenes* strains 10403S $\Delta$ *eslB*(1), 10403S $\Delta$ *eslB*(2),  
590 10403S $\Delta$ *eslB*(1) compl. and 10403S $\Delta$ *eslB*(2) compl. were deposited in the European Nucleotide  
591 Archive under the accession number PRJEB40123.

592

## 593 ACKNOWLEDGEMENTS

594 We thank Ivan Andrew and Jaspreet Haywood from the CSC Genomics Laboratory,  
595 Hammersmith Hospital, for their help with the whole genome sequencing and Annika Gillis  
596 for help with the genome sequence analysis. We would also like to thank Charlotte S. C.  
597 Michaux and Sophie Helaine for the bone marrow-derived macrophages and Neil Singh for the  
598 support during the transmission electron microscopy experiments. We are grateful to Prof. Jörg  
599 Stülke for providing JR and LMS with laboratory space, equipment and consumables. This  
600 work was funded by the Wellcome Trust grant 210671/Z/18/Z and MRC grant MR/P011071/1  
601 to AG, the German research foundation (DFG) grants RI 2920/1-1 and RI 2920/2-1 to JR, and  
602 the Wellcome Trust grant 207467/Z/17/Z and MRC grant MR/R00997X/1 to MSD. LMS was

603 supported by the Göttingen Graduate School for Neurosciences, Biophysics, and Molecular  
604 Biosciences (GGNB, DFG grant GSC226/4).  
605



606 **FIGURES AND FIGURE LEGENDS**

607

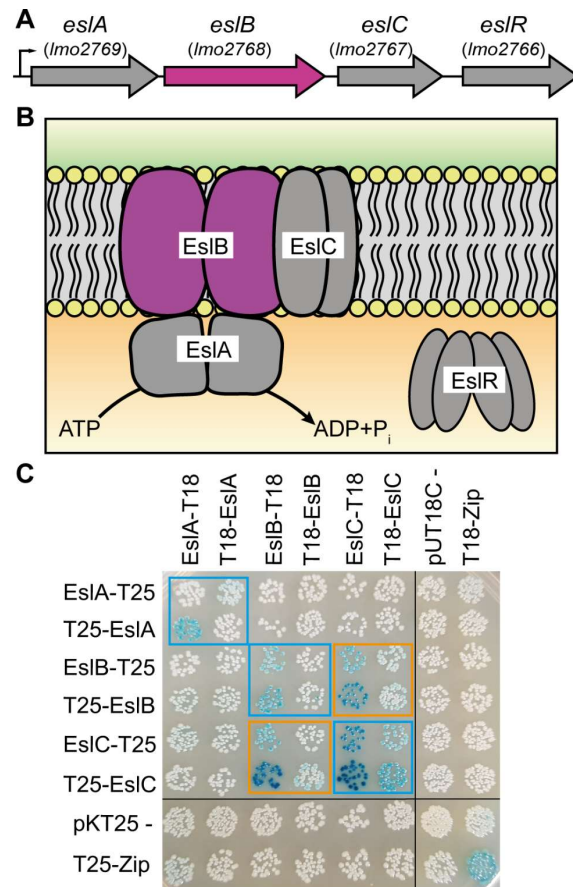

608

609

610 **Figure 1: Schematic representation of the *L. monocytogenes* *eslABCR* operon and**  
 611 **interaction of the ABC transporter components EslABC.** (A) Genomic arrangement of the  
 612 *eslABCR* operon in *L. monocytogenes*. Arrowheads indicate the orientation of the genes. Small  
 613 black arrow indicates the promoter identified in a previous study (20). (B) Model of the ABC  
 614 transporter composed of the NBD protein EslA, which hydrolyses ATP, the TMD proteins  
 615 EslB and EslC, and the cytoplasmic RpiR family transcription regulator EslR. The *eslB* gene  
 616 and EslB protein, which were investigated as part of the study, are highlighted in pink. (C)  
 617 Interactions between the ABC transporter components. Plasmids encoding fusions of EslA,  
 618 EslB and EslC and the T18- and T25-fragments of the *Bordetella pertussis* adenylate cyclase  
 619 were co-transformed into *E. coli* BTH101. Empty vectors pKT25 and pUT18C were used as  
 620 negative control and pKT25- and pUT18C-Zip as positive control. Black lines indicate where  
 621 lanes, which were not required, were removed. Self-interactions are marked with blue boxes  
 622 and protein-protein interactions with orange boxes. A representative image of three repeats is  
 623 shown.

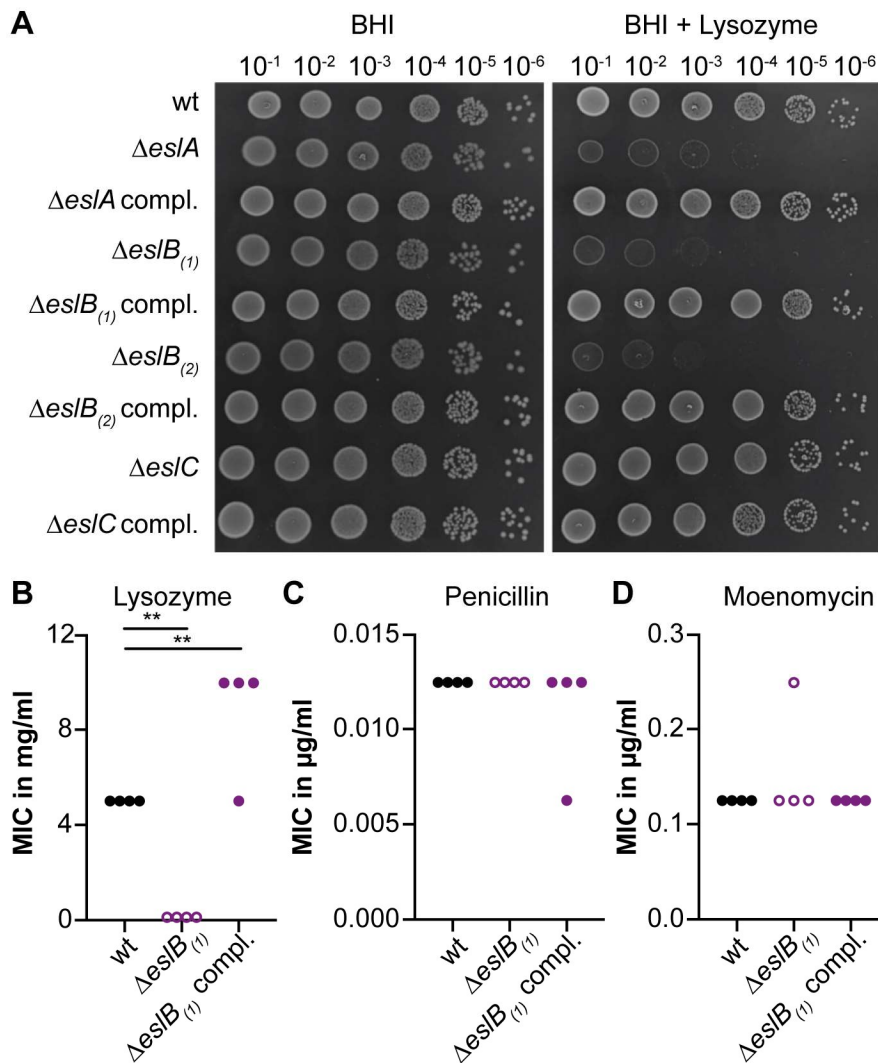

624

625

626 **Figure 2: Impact of *eslB* deletion on resistance towards cell wall-targeting antimicrobials.**

627 (A) Plate spotting assay. Dilutions of overnight cultures of *L. monocytogenes* strains 10403S

628 (wt), 10403SΔ*eslA*, 10403SΔ*eslA* compl., 10403SΔ*eslB*<sub>(1)</sub>, 10403SΔ*eslB*<sub>(1)</sub> compl.,

629 10403SΔ*eslB*<sub>(2)</sub>, 10403SΔ*eslB*<sub>(2)</sub> compl., 10403SΔ*eslC*, and 10403SΔ*eslC* compl. were spotted

630 on BHI plates and BHI plates containing 100 μg/ml lysozyme, both supplemented with 1 mM

631 IPTG. A representative result from three independent experiments is shown. (B-D) Minimal

632 inhibitory concentration (MIC) of *L. monocytogenes* strains 10403S (wt), 10403SΔ*eslB*<sub>(1)</sub> and

633 10403SΔ*eslB*<sub>(1)</sub> compl. towards (B) lysozyme, (C) penicillin G and (D) moenomycin. Strain

634 10403SΔ*eslB*<sub>(1)</sub> compl. was grown in the presence of 1 mM IPTG. The results of four

635 independent experiments are shown. For statistical analysis, a one-way ANOVA followed by

636 a Dunnett's multiple comparisons test was used (\*\*  $p \leq 0.01$ ).

637

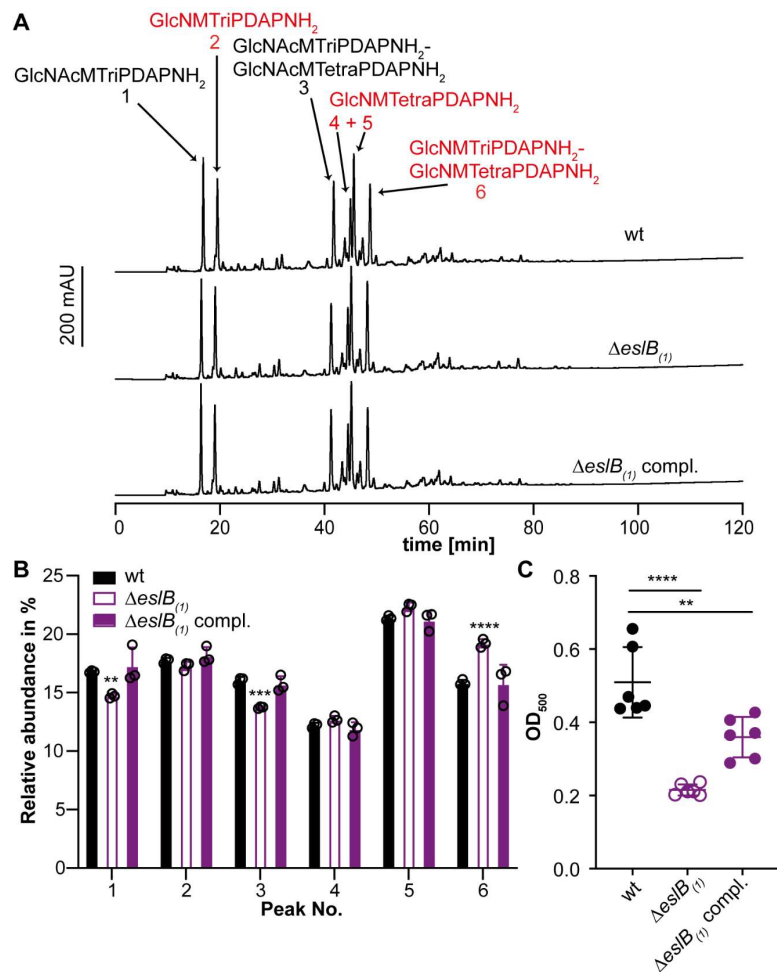

638

639

640 **Figure 3: Deletion of *eslB* leads to changes in the peptidoglycan structure.** (A) HPLC  
641 analysis of muropeptides derived from mutanolysin digested peptidoglycan isolated from  
642 strains 10403S (wt), 10403S $\Delta eslB_{(1)}$  and 10403S $\Delta eslB_{(1)}$  compl.. The muropeptide spectrum of  
643 the wildtype strain 10403S has been previously published (33). Major muropeptide peaks are  
644 labelled and numbered 1-6 according to previously published HPLC spectra (18, 34), with  
645 labels shown in red corresponding to muropeptides with *N*-deacetylated GlcNAc residues and  
646 peaks 1-2 corresponding to monomeric and 4-6 to dimeric (crosslinked) muropeptide  
647 fragments. Muropeptide abbreviations: GlcNAc – *N*-acetylglucosamine; GlcN – glucosamine;  
648 M – *N*-acetylmuramic acid; TriPDAPNH<sub>2</sub> – L-alanyl- $\gamma$ -D-glutamyl-amidated *meso*-  
649 diaminopimelic acid; TetraPDAPGlcNAc – L-alanyl- $\gamma$ -D-glutamyl-amidated *meso*-  
650 diaminopimelyl-D-alanine. (B) Quantification of the relative abundance of muropeptide peaks  
651 1-6 for peptidoglycan isolated of strains 10403S (wt), 10403S $\Delta eslB_{(1)}$  and 10403S $\Delta eslB_{(1)}$   
652 compl.. For quantification, the sum of the peak areas was set to 100% and the area of individual  
653 peaks was determined. Average values and standard deviations were calculated from three  
654 independent peptidoglycan extractions and plotted. For statistical analysis, a two-way ANOVA

655 followed by a Dunnett's multiple comparisons test was used (\*\*  $p \leq 0.01$ , \*\*\*  $p \leq 0.001$ , \*\*\*\*  
656  $p \leq 0.0001$ ). (C) The degree of *O*-acetylation of purified peptidoglycan of strains 10403S (wt),  
657 10403S $\Delta eslB_{(1)}$  and 10403S $\Delta eslB_{(1)}$  compl. was determined by a colorimetric assay as  
658 described in the methods section. Average values and standard deviations were calculated from  
659 three independent peptidoglycan extractions and two technical repeats and plotted. For  
660 statistical analysis, a two-way ANOVA followed by a Dunnett's multiple comparisons test was  
661 used (\*\*  $p \leq 0.01$ , \*\*\*\*  $p \leq 0.0001$ ).

662

663

664

665

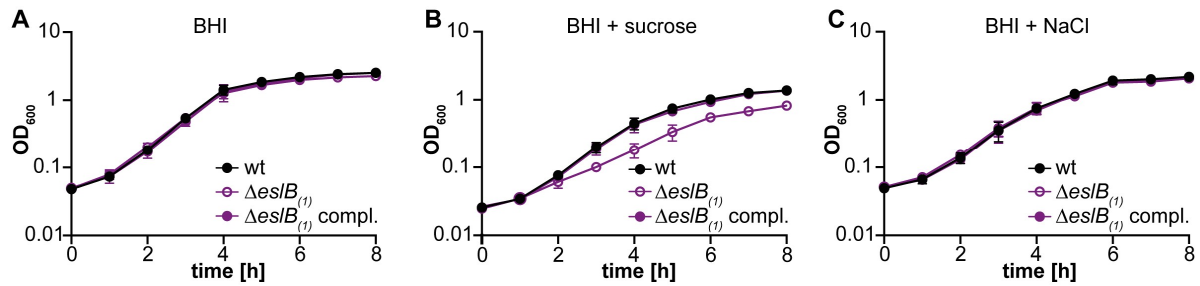

666

667

668 **Figure 4: Addition of sucrose but not NaCl negatively impacts the growth of the *L.***

669 ***monocytogenes eslB* mutant strain. (A-C). Bacterial growth curves. *L. monocytogenes* strains**

670 10403S (wt), 10403S $\Delta eslB_{(1)}$  and 10403S $\Delta eslB_{(1)}$  compl. were grown in (A) BHI broth, (B)

671 BHI broth containing 0.5 M sucrose or (C) BHI broth containing 0.5 M NaCl. Strain

672 10403S $\Delta eslB_{(1)}$  compl. was grown in the presence of 1 mM IPTG. OD<sub>600</sub> readings were

673 determined at hourly intervals and the average values and standard deviations from three

674 independent experiments calculated and plotted.

675

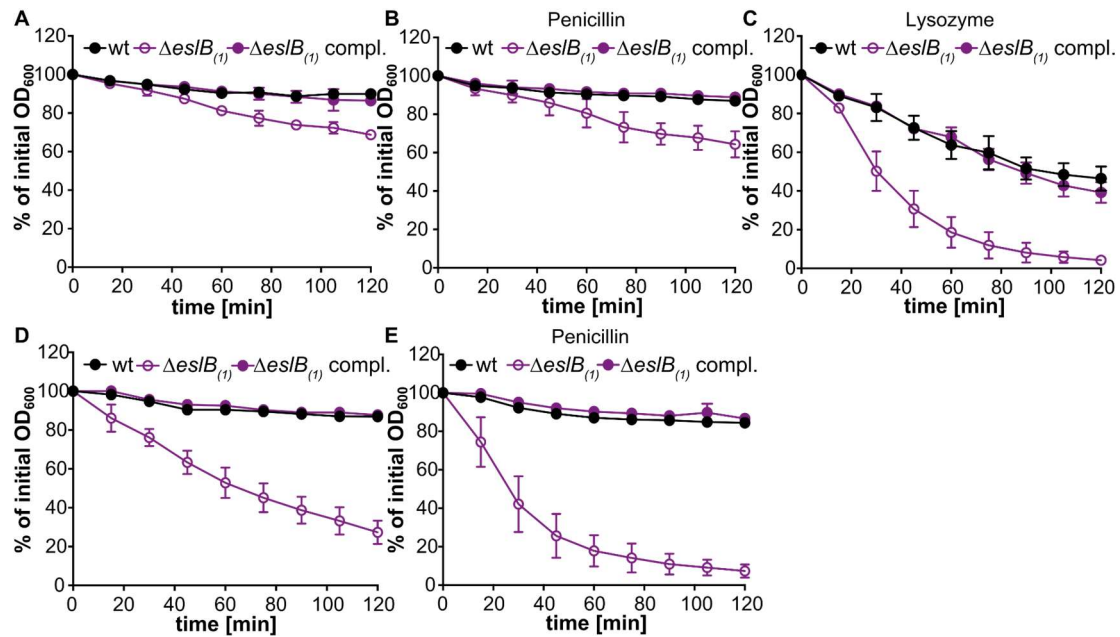

676

677

678 **Figure 5: An *L. monocytogenes* *eslB* deletion strain shows increased endogenous and**  
679 **lysozyme-induced autolysis.** Autolysis assays were performed with *L. monocytogenes* strains  
680 10403S (wt), 10403S $\Delta eslB_{(1)}$  and 10403S $\Delta eslB_{(1)}$  compl.. Bacteria were grown for 4 h in (A-  
681 C) BHI medium or (D-E) in BHI medium containing 0.5 M sucrose (containing 1 mM IPTG  
682 for 10403S $\Delta eslB_{(1)}$  compl.) and subsequently bacterial suspensions prepared in (A, D) 50 mM  
683 Tris HCl pH 8, (B, E) 50 mM Tris HCl pH 8 containing 25  $\mu$ g/ml penicillin, or (C) 2.5  $\mu$ g/ml  
684 lysozyme. Cell lysis was followed by taking OD<sub>600</sub> readings every 15 min. The initial OD<sub>600</sub>  
685 reading for each bacterial suspension was set to 100% and subsequent readings are shown as  
686 % of the initial OD<sub>600</sub> reading. The average % OD<sub>600</sub> values and standard deviations were  
687 calculated from three independent experiments and plotted.

688

689



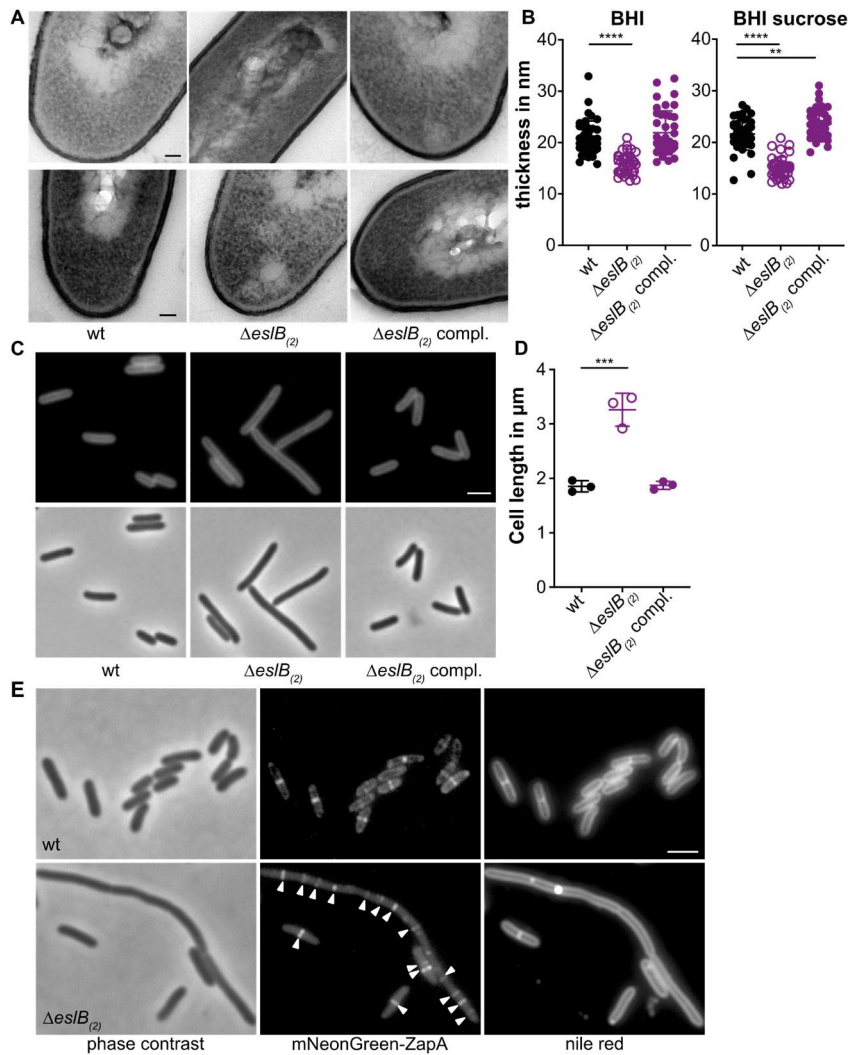

690

691

692 **Figure 6: The *L. monocytogenes eslB* mutant produces a thinner cell wall, has a cell**  
693 **division defect and bacteria have an increased cell length. (A)** Transmission electron  
694 microscopy images. Ultrathin-sectioned cells of *L. monocytogenes* strains 10403S (wt),  
695 10403S $\Delta eslB_{(2)}$  and 10403S $\Delta eslB_{(2)}$  *compl.* were subjected to transmission electron  
696 microscopy after growth in BHI broth (upper panel) or BHI broth containing 0.5 M sucrose  
697 (lower panel). Scale bar is 50 nm. Representative images from two independent experiments  
698 are shown. (B) Cell wall thickness. Per growth condition, cell wall thickness of 40 cells was  
699 measured at three different locations and the average values plotted. For statistical analysis, a  
700 two-way ANOVA followed by a Dunnett's multiple comparisons test was used (\*\*  $p \leq 0.01$ ,  
701 \*\*\*\*  $p \leq 0.0001$ ). (C) Microscopy images of *L. monocytogenes* strains 10403S (wt),  
702 10403S $\Delta eslB_{(2)}$  and 10403S $\Delta eslB_{(2)}$  *compl.*. Bacterial membranes were stained with Nile red  
703 and cells analyzed by phase contrast and fluorescence microscopy. Scale bar is 2  $\mu m$ .  
704 Representative images from three independent experiments are shown. (D) Cell length of *L.*

705 *monocytogenes* strains 10403S (wt), 10403S $\Delta$ *eslB*<sub>(2)</sub> and 10403S $\Delta$ *eslB*<sub>(2)</sub> compl.. The cell  
706 length of 300 cells per strain was measured and the median cell length calculated. Three  
707 independent experiments were performed, and the average values and standard deviation of the  
708 median cell length plotted. For statistical analysis, a one-way ANOVA analysis followed by a  
709 Dunnett's multiple comparisons test was used (\*\*\*)  $p \leq 0.001$ . (E) Localization of  
710 mNeonGreen-ZapA in *L. monocytogenes* strains 10403S (wt) and 10403S $\Delta$ *eslB*<sub>(2)</sub>. Bacterial  
711 membranes were stained with Nile red and cells analyzed by phase contrast (left panel) and  
712 fluorescence microscopy to detect mNeonGreen (middle panel) and Nile red fluorescence  
713 signals (right panel). White arrows highlight ZapA foci in cells of the *L. monocytogenes eslB*  
714 mutant. Scale bar is 2  $\mu$ m. Representative images from three independent experiments are  
715 shown.

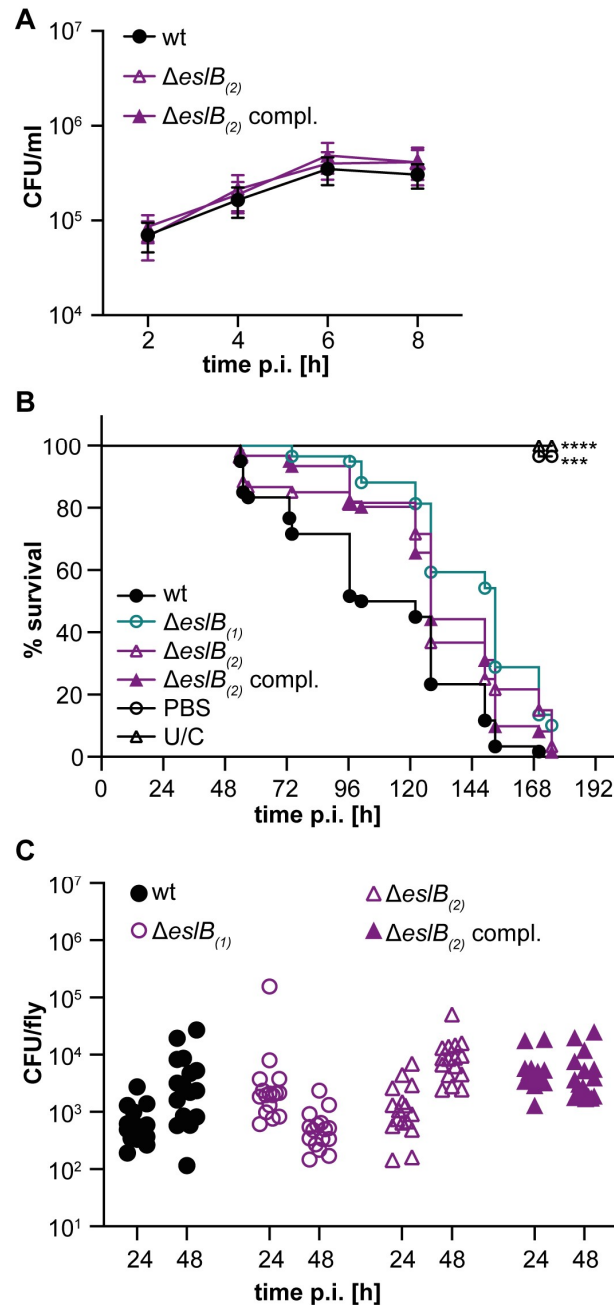

716

717

718 **Figure 7: Impact of the deletion of *eslB* on the virulence of *L. monocytogenes*.** (A)

719 Intracellular growth of *L. monocytogenes* strains 10403S (wt), 10403S $\Delta eslB_{(2)}$  and

720 10403S $\Delta eslB_{(2)}$  compl. in mouse bone marrow-derived macrophages (BMMs). The infection

721 assay was performed as described in the methods section. The average CFU count/ml and

722 standard deviations from three independent experiments were calculated and plotted. (B)

723 Survival curve of flies infected with *L. monocytogenes*. Flies were infected with *L.*

724 *monocytogenes* strains 10403S (wt), 10403S $\Delta eslB_{(1)}$ , 10403S $\Delta eslB_{(2)}$  and 10403S $\Delta eslB_{(2)}$

725 compl.. Uninjected control flies (U/C) and flies injected with PBS were used as controls. Fly

726 death was monitored daily. For statistical analysis, a one-way ANOVA followed by a  
727 Dunnett's multiple comparisons test was used (\*\* $p \leq 0.001$ , \*\*\*\* $p \leq 0.0001$ ). (C) Bacterial  
728 quantification. 16 flies infected with the indicated *L. monocytogenes* strain were collected 24  
729 and 48 h post infection and bacterial load (CFU) determined as described in the methods  
730 section. For statistical analysis, a nested one-way ANOVA followed by a Dunnett's multiple  
731 comparisons test was used. The observed differences were not statistically significant.

732

733

734

## 735 REFERENCES

- 736 1. Höltje JV. 1998. Growth of the stress-bearing and shape-maintaining murein sacculus  
737 of *Escherichia coli*. *Microbiol Mol Biol Rev* 62:181-203.
- 738 2. van Heijenoort J. 2001. Formation of the glycan chains in the synthesis of bacterial  
739 peptidoglycan. *Glycobiology* 11:25R-36R.
- 740 3. Koch AL. 2003. Bacterial wall as target for attack: past, present, and future research.  
741 *Clin Microbiol Rev* 16:673-87.
- 742 4. Sarkar P, Yarlagadda V, Ghosh C, Haldar J. 2017. A review on cell wall synthesis  
743 inhibitors with an emphasis on glycopeptide antibiotics. *Medchemcomm* 8:516-533.
- 744 5. Huber G, Neesemann G. 1968. Moenomycin, an inhibitor of cell wall synthesis.  
745 *Biochem Biophys Res Commun* 30:7-13.
- 746 6. Sauvage E, Terrak M. 2016. Glycosyltransferases and Transpeptidases/Penicillin-  
747 Binding Proteins: Valuable Targets for New Antibacterials. *Antibiotics (Basel)* 5.
- 748 7. Tipper DJ, Strominger JL. 1965. Mechanism of action of penicillins: a proposal based  
749 on their structural similarity to acyl-D-alanyl-D-alanine. *Proc Natl Acad Sci U S A*  
750 54:1133-41.
- 751 8. Callewaert L, Michiels CW. 2010. Lysozymes in the animal kingdom. *J Biosci* 35:127-  
752 60.
- 753 9. Boneca IG, Dussurget O, Cabanes D, Nahori MA, Sousa S, Lecuit M, Psylinakis E,  
754 Bouriotis V, Hugot JP, Giovannini M, Coyle A, Bertin J, Namane A, Rousselle JC,  
755 Cayet N, Prevost MC, Balloy V, Chignard M, Philpott DJ, Cossart P, Girardin SE.  
756 2007. A critical role for peptidoglycan N-deacetylation in *Listeria* evasion from the  
757 host innate immune system. *Proc Natl Acad Sci U S A* 104:997-1002.
- 758 10. Aubry C, Goulard C, Nahori MA, Cayet N, Decalf J, Sachse M, Boneca IG, Cossart P,  
759 Dussurget O. 2011. OatA, a peptidoglycan O-acetyltransferase involved in *Listeria*  
760 *monocytogenes* immune escape, is critical for virulence. *J Infect Dis* 204:731-40.
- 761 11. Benachour A, Ladjouzi R, Le Jeune A, Hébert L, Thorpe S, Courtin P, Chapot-Chartier  
762 MP, Prajsnar TK, Foster SJ, Mesnage S. 2012. The lysozyme-induced peptidoglycan  
763 N-acetylglucosamine deacetylase PgdA (EF1843) is required for *Enterococcus faecalis*  
764 virulence. *J Bacteriol* 194:6066-73.
- 765 12. Hébert L, Courtin P, Torelli R, Sanguinetti M, Chapot-Chartier MP, Auffray Y,  
766 Benachour A. 2007. *Enterococcus faecalis* constitutes an unusual bacterial model in  
767 lysozyme resistance. *Infect Immun* 75:5390-8.
- 768 13. Vollmer W, Tomasz A. 2000. The *pgdA* gene encodes for a peptidoglycan N-  
769 acetylglucosamine deacetylase in *Streptococcus pneumoniae*. *J Biol Chem* 275:20496-  
770 501.
- 771 14. Bera A, Herbert S, Jakob A, Vollmer W, Götz F. 2005. Why are pathogenic  
772 staphylococci so lysozyme resistant? The peptidoglycan O-acetyltransferase OatA is  
773 the major determinant for lysozyme resistance of *Staphylococcus aureus*. *Mol*  
774 *Microbiol* 55:778-87.
- 775 15. Bera A, Biswas R, Herbert S, Kulauzovic E, Weidenmaier C, Peschel A, Götz F. 2007.  
776 Influence of wall teichoic acid on lysozyme resistance in *Staphylococcus aureus*. *J*  
777 *Bacteriol* 189:280-3.
- 778 16. Herbert S, Bera A, Nerz C, Kraus D, Peschel A, Goerke C, Meehl M, Cheung A, Gotz  
779 F. 2007. Molecular basis of resistance to muramidase and cationic antimicrobial peptide  
780 activity of lysozyme in staphylococci. *PLoS Pathog* 3:e102.
- 781 17. Le Jeune A, Torelli R, Sanguinetti M, Giard JC, Hartke A, Auffray Y, Benachour A.  
782 2010. The extracytoplasmic function sigma factor SigV plays a key role in the original  
783 model of lysozyme resistance and virulence of *Enterococcus faecalis*. *PLoS One*  
784 5:e9658.

- 785 18. Burke TP, Loukitcheva A, Zemansky J, Wheeler R, Boneca IG, Portnoy DA. 2014.  
786 *Listeria monocytogenes* is resistant to lysozyme through the regulation, not the  
787 acquisition, of cell wall-modifying enzymes. *J Bacteriol* 196:3756-67.
- 788 19. Durack J, Burke TP, Portnoy DA. 2015. A prl mutation in SecY suppresses secretion  
789 and virulence defects of *Listeria monocytogenes* *secA2* mutants. *J Bacteriol* 197:932-  
790 42.
- 791 20. Toledo-Arana A, Dussurget O, Nikitas G, Sesto N, Guet-Revillet H, Balestrino D, Loh  
792 E, Gripenland J, Tiensuu T, Vaitkevicius K, Barthelemy M, Vergassola M, Nahori MA,  
793 Soubigou G, Regnault B, Coppee JY, Lecuit M, Johansson J, Cossart P. 2009. The  
794 *Listeria* transcriptional landscape from saprophytism to virulence. *Nature* 459:950-6.
- 795 21. Higgins CF. 1992. ABC transporters: from microorganisms to man. *Annu Rev Cell*  
796 *Biol* 8:67-113.
- 797 22. Berntsson RP, Smits SH, Schmitt L, Slotboom DJ, Poolman B. 2010. A structural  
798 classification of substrate-binding proteins. *FEBS Lett* 584:2606-17.
- 799 23. Tanaka KJ, Song S, Mason K, Pinkett HW. 2018. Selective substrate uptake: The role  
800 of ATP-binding cassette (ABC) importers in pathogenesis. *Biochim Biophys Acta*  
801 *Biomembr* 1860:868-877.
- 802 24. Locher KP. 2016. Mechanistic diversity in ATP-binding cassette (ABC) transporters.  
803 *Nat Struct Mol Biol* 23:487-93.
- 804 25. Mächtel R, Narducci A, Griffith DA, Cordes T, Orelle C. 2019. An integrated transport  
805 mechanism of the maltose ABC importer. *Res Microbiol* 170:321-337.
- 806 26. Slotboom DJ. 2014. Structural and mechanistic insights into prokaryotic energy-  
807 coupling factor transporters. *Nat Rev Microbiol* 12:79-87.
- 808 27. Davidson AL, Dassa E, Orelle C, Chen J. 2008. Structure, function, and evolution of  
809 bacterial ATP-binding cassette systems. *Microbiol Mol Biol Rev* 72:317-64, table of  
810 contents.
- 811 28. Camilli A, Tilney LG, Portnoy DA. 1993. Dual roles of *plcA* in *Listeria monocytogenes*  
812 pathogenesis. *Mol Microbiol* 8:143-57.
- 813 29. Lauer P, Chow MY, Loessner MJ, Portnoy DA, Calendar R. 2002. Construction,  
814 characterization, and use of two *Listeria monocytogenes* site-specific phage integration  
815 vectors. *J Bacteriol* 184:4177-86.
- 816 30. Karimova G, Pidoux J, Ullmann A, Ladant D. 1998. A bacterial two-hybrid system  
817 based on a reconstituted signal transduction pathway. *Proc Natl Acad Sci U S A*  
818 95:5752-6.
- 819 31. de Jonge BL, Chang YS, Gage D, Tomasz A. 1992. Peptidoglycan composition of a  
820 highly methicillin-resistant *Staphylococcus aureus* strain. The role of penicillin binding  
821 protein 2A. *J Biol Chem* 267:11248-54.
- 822 32. Corrigan RM, Abbott JC, Burhenne H, Kaeffer V, Gründling A. 2011. c-di-AMP is a  
823 new second messenger in *Staphylococcus aureus* with a role in controlling cell size and  
824 envelope stress. *PLoS Pathog* 7:e1002217.
- 825 33. Rismondo J, Halbedel S, Gründling A. 2019. Cell Shape and Antibiotic Resistance Are  
826 Maintained by the Activity of Multiple FtsW and RodA Enzymes in *Listeria*  
827 *monocytogenes*. *MBio* 10.
- 828 34. Rismondo J, Möller L, Aldridge C, Gray J, Vollmer W, Halbedel S. 2015. Discrete and  
829 overlapping functions of peptidoglycan synthases in growth, cell division and virulence  
830 of *Listeria monocytogenes*. *Mol Microbiol* 95:332-51.
- 831 35. Gudlavalleti SK, Datta AK, Tzeng YL, Noble C, Carlson RW, Stephens DS. 2004. The  
832 *Neisseria meningitidis* serogroup A capsular polysaccharide O-3 and O-4  
833 acetyltransferase. *J Biol Chem* 279:42765-73.



- 834 36. Rueden CT, Schindelin J, Hiner MC, DeZonia BE, Walter AE, Arena ET, Eliceiri KW.  
835 2017. ImageJ2: ImageJ for the next generation of scientific image data. BMC  
836 Bioinformatics 18:529.
- 837 37. Stapels DAC, Hill PWS, Westermann AJ, Fisher RA, Thurston TL, Saliba AE,  
838 Blommestein I, Vogel J, Helaine S. 2018. *Salmonella* persists undermine host  
839 immune defenses during antibiotic treatment. Science 362:1156-1160.
- 840 38. Sharrock J, Estacio-Gomez A, Jacobson J, Kierdorf K, Southall TD, Dionne MS. 2019.  
841 *fs(1)h* controls metabolic and immune function and enhances survival via AKT and  
842 FOXO in *Drosophila*. Dis Model Mech 12.
- 843 39. Gaillard JL, Berche P, Frehel C, Gouin E, Cossart P. 1991. Entry of *L. monocytogenes*  
844 into cells is mediated by internalin, a repeat protein reminiscent of surface antigens  
845 from gram-positive cocci. Cell 65:1127-41.
- 846 40. Bierne H, Sabet C, Personnic N, Cossart P. 2007. Internalins: a complex family of  
847 leucine-rich repeat-containing proteins in *Listeria monocytogenes*. Microbes Infect  
848 9:1156-66.
- 849 41. Pilgrim S, Kolb-Maurer A, Gentschev I, Goebel W, Kuhn M. 2003. Deletion of the  
850 gene encoding p60 in *Listeria monocytogenes* leads to abnormal cell division and loss  
851 of actin-based motility. Infect Immun 71:3473-84.
- 852 42. Carroll SA, Hain T, Technow U, Darji A, Pashalidis P, Joseph SW, Chakraborty T.  
853 2003. Identification and characterization of a peptidoglycan hydrolase, MurA, of  
854 *Listeria monocytogenes*, a muramidase needed for cell separation. J Bacteriol  
855 185:6801-8.
- 856 43. Daffre S, Kylsten P, Samakovlis C, Hultmark D. 1994. The lysozyme locus in  
857 *Drosophila melanogaster*: an expanded gene family adapted for expression in the  
858 digestive tract. Mol Gen Genet 242:152-62.
- 859 44. Rae CS, Geissler A, Adamson PC, Portnoy DA. 2011. Mutations of the *Listeria*  
860 *monocytogenes* peptidoglycan N-deacetylase and O-acetylase result in enhanced  
861 lysozyme sensitivity, bacteriolysis, and hyperinduction of innate immune pathways.  
862 Infect Immun 79:3596-606.
- 863 45. Rismondo J, Wamp S, Aldridge C, Vollmer W, Halbedel S. 2018. Stimulation of PgdA-  
864 dependent peptidoglycan N-deacetylation by GpsB-PBP A1 in *Listeria monocytogenes*.  
865 Mol Microbiol 107:472-487.
- 866 46. Halbedel S, Hahn B, Daniel RA, Flieger A. 2012. DivIVA affects secretion of  
867 virulence-related autolysins in *Listeria monocytogenes*. Mol Microbiol 83:821-39.  
868
